# Supplementary material for: Novel Bacteriophages Show Activity against Selected Australian Clinical Strains of Pseudomonas aeruginosa
Source: MDPI journal article supplement (doi:10.3390/microorganisms10020210), 2022-01-19
Supplement: s1 [file s1]

## *Supplementary Material*

# **Novel Bacteriophages Show Activity Against Selected Australian Clinical Strains of *Pseudomonas aeruginosa***

Namonyo, S.,<sup>1,2</sup> Carvalho, G.,<sup>1\*</sup> Guo, J.,<sup>1</sup> and Weynberg, K.D.<sup>3\*</sup>

<sup>1</sup>Australian Centre for Water and Environmental Biotechnology, The University of Queensland, St. Lucia, QLD 4072, Australia

<sup>2</sup>Queensland Alliance for Environmental Health Services, The University of Queensland, Woolloongabba, QLD 4102, Australia

<sup>3</sup>Australian Centre for Ecogenomics, School of Chemistry & Molecular Biosciences, The University of Queensland, St. Lucia, QLD 4072, Australia

\* Correspondence: KDW k.weynberg@uq.edu.au; GC g.carvalho@uq.edu.au

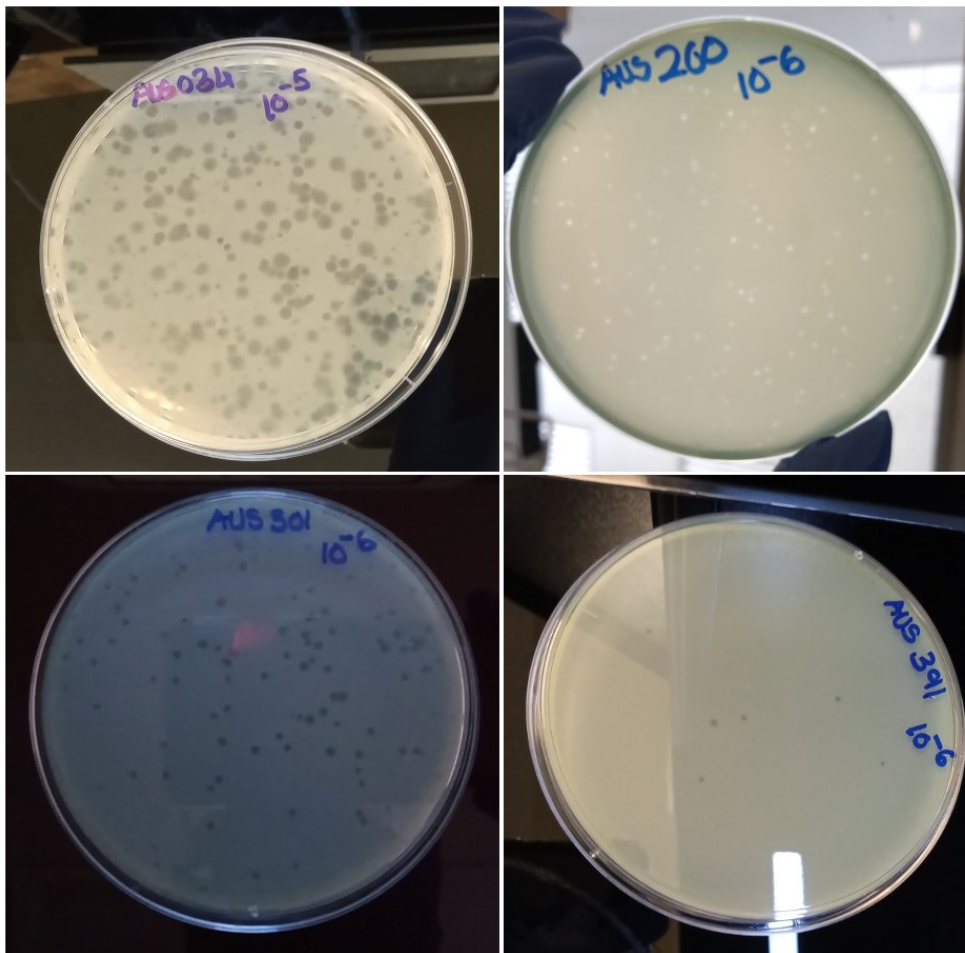

Supplementary Figure S1: Plaques formed by *Pseudomonas* Phage\_AUS034, *Pseudomonas* Phage\_AUS260, *Pseudomonas* Phage\_AUS301 and *Pseudomonas* Phage\_AUS391 respectively.

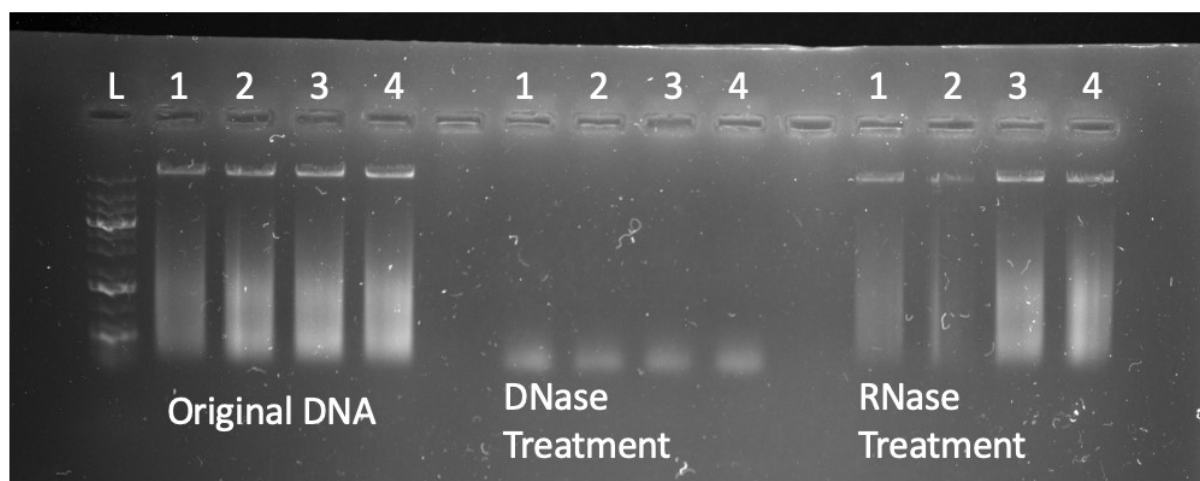

Supplementary Figure S2. Nuclease digest of the extracted phage DNA. L, 1, 2, 3 and 4 are 1Kb+ DNA Ladder, Pseudomonas Phage\_AUS034, Pseudomonas Phage\_AUS260, Pseudomonas Phage\_AUS301 and Pseudomonas Phage\_AUS391 respectively.

Supplementary Table S1: A list of the coding sequences (CDSs) and their annotations in the genome of Pseudomonas Phage\_AUS034

| Gene domain | Strand | Gene product                                     | Length | e-Value   | Similar to                           | Ontological terms (GO IDs)    | InterPro GO IDs | InterPro GO Names |
|-------------|--------|--------------------------------------------------|--------|-----------|--------------------------------------|-------------------------------|-----------------|-------------------|
| 1630→1935   | +      | hypothetical protein                             | 306    | 2.66E-56  | Pseudomonas phage oldone             | n/a                           | no IPS match    | no IPS match      |
| 1939→2421   | +      | hypothetical protein                             | 483    | 1.47E-111 | Pseudomonas phage U47                | n/a                           | no IPS match    | no IPS match      |
| 2496→2714   | +      | hypothetical protein                             | 219    | 9.51E-45  | Pseudomonas phage vB_PaeP_C2-10_Ab22 | n/a                           | no IPS match    | no IPS match      |
| 2711→2851   | +      | hypothetical protein                             | 141    | 4.90E-23  | Pseudomonas phage PhiCHU             | n/a                           | no IPS match    | no IPS match      |
| 2980←3234   | -      | hypothetical protein                             | 255    | 3.72E-41  | Pseudomonas phage SaPL               | n/a                           | no GO terms     | no IPS match      |
| 3346→3600   | +      | hypothetical protein                             | 255    | 5.30E-54  | Pseudomonas phage SaPL               | n/a                           | no IPS match    | no IPS match      |
| 3756→3902   | +      | hypothetical protein                             | 147    | 5.50E-26  | Pseudomonas phage U47                | n/a                           | no IPS match    | no IPS match      |
| 3912→4175   | +      | hypothetical protein                             | 264    | 2.18E-58  | Pseudomonas phage SaPL               | n/a                           | no IPS match    | no IPS match      |
| 4165→4446   | +      | hypothetical protein                             | 282    | 2.54E-61  | Pseudomonas virus Pa222              | n/a                           | no IPS match    | no IPS match      |
| 4613→4864   | +      | hypothetical protein                             | 252    | 6.80E-43  | Pseudomonas phage vB_PaeP_C2-10_Ab22 | C:GO:0016021                  | no GO terms     | n/a               |
| 4861←5292   | -      | hypothetical protein                             | 432    | 6.73E-100 | Pseudomonas virus Pa222              | n/a                           | no IPS match    | no IPS match      |
| 5348→5662   | +      | hypothetical protein                             | 315    | 1.19E-34  | Pseudomonas phage SaPL               | C:GO:0016021                  | no GO terms     | n/a               |
| 5884→6846   | +      | hypothetical protein                             | 963    | 0         | Pseudomonas phage DL54               | n/a                           | no IPS match    | no IPS match      |
| 6865→7821   | +      | hypothetical protein                             | 957    | 0         | Pseudomonas phage oldone             | n/a                           | no IPS match    | no IPS match      |
| 7818→8618   | +      | hypothetical protein                             | 801    | 0         | Pseudomonas phage SaPL               | n/a                           | no GO terms     | no GO terms       |
| 8611→9180   | +      | hypothetical protein                             | 570    | 5.57E-137 | Pseudomonas virus Pa222              | n/a                           | no IPS match    | no IPS match      |
| 9156→10331  | +      | hypothetical protein                             | 1176   | 0         | Pseudomonas virus Pa222              | n/a                           | no GO terms     | no GO terms       |
| 10343→11875 | +      | glutamine--fructose-6-phosphate aminotransferase | 1533   | 0         | Pseudomonas phage phiPA01_302        | F:GO:0004360                  | no GO terms     | no GO terms       |
| 11885→12106 | +      | hypothetical protein                             | 222    | 1.01E-44  | Pseudomonas phage oldone             | n/a                           | no IPS match    | no IPS match      |
| 12234→13118 | +      | hypothetical protein                             | 885    | 0         | Pseudomonas virus Pa222              | n/a                           | no GO terms     | no GO terms       |
| 13118→13516 | +      | putative gamma-glutamyl cyclotransferase         | 399    | 2.55E-92  | Pseudomonas phage SaPL               | F:GO:0016740;<br>F:GO:0061929 | no GO terms     | no GO terms       |
| 13516→13893 | +      | hypothetical protein                             | 378    | 6.88E-88  | Pseudomonas virus Pa222              | n/a                           | no IPS match    | no IPS match      |

|             |   |                                                               |      |           |                               |                                                                 |                                                                 |                                                                                                                          |
|-------------|---|---------------------------------------------------------------|------|-----------|-------------------------------|-----------------------------------------------------------------|-----------------------------------------------------------------|--------------------------------------------------------------------------------------------------------------------------|
| 13894→15603 | + | DNA primase/ helicase                                         | 1710 | 0         | Pseudomonas phage oldone      | F:GO:0003678;<br>F:GO:0005524;<br>P:GO:0006260;<br>P:GO:0032508 | F:GO:0003678;<br>F:GO:0005524;<br>P:GO:0006260                  | F:DNA helicase<br>activity; F:ATP<br>binding; P:DNA<br>replication                                                       |
| 15587→16096 | + | DNA polymerase III                                            | 510  | 2.11E-122 | Pseudomonas virus Pa223       | F:GO:0003676;<br>F:GO:0004527;<br>P:GO:0090305                  | F:GO:0003676                                                    | n/a                                                                                                                      |
| 16109→16378 | + | hypothetical protein                                          | 270  | 4.40E-50  | Pseudomonas phage oldone      | n/a                                                             | no GO terms                                                     | no GO terms                                                                                                              |
| 16410→16643 | + | hypothetical protein                                          | 234  | 7.19E-33  | Pseudomonas phage phiPA01_302 | n/a                                                             | no GO terms                                                     | no GO terms                                                                                                              |
| 16624→16815 | + | hypothetical protein                                          | 192  | 8.28E-38  | Pseudomonas phage phiPA01_302 | n/a                                                             | no IPS match                                                    | no IPS match                                                                                                             |
| 16805→16966 | + | hypothetical protein                                          | 162  | 3.83E-29  | Pseudomonas virus Pa222       | n/a                                                             | no IPS match                                                    | no IPS match                                                                                                             |
| 16957→17235 | + | hypothetical protein                                          | 279  | 4.09E-58  | Pseudomonas phage U47         | C:GO:0016021                                                    | no GO terms                                                     | n/a                                                                                                                      |
| 17366→17821 | + | hypothetical protein                                          | 456  | 4.11E-106 | Pseudomonas phage DL54        | n/a                                                             | no IPS match                                                    | no IPS match                                                                                                             |
| 17826→18023 | + | hypothetical protein                                          | 198  | 2.28E-27  | Pseudomonas phage oldone      | n/a                                                             | no IPS match                                                    | no IPS match                                                                                                             |
| 18024→19661 | + | DNA polymerase III                                            | 1638 | 0         | Pseudomonas virus Pa222       | n/a                                                             | F:GO:0003677;<br>F:GO:0003887;<br>P:GO:0006260;<br>P:GO:0006261 | F:DNA binding;<br>F:DNA-directed DNA<br>polymerase activity;<br>P:DNA replication;<br>P:DNA-dependent<br>DNA replication |
| 19731→20285 | + | hypothetical protein                                          | 555  | 8.28E-117 | Pseudomonas virus Pa222       | n/a                                                             | no GO terms                                                     | no GO terms                                                                                                              |
| 20263→20766 | + | hypothetical protein                                          | 504  | 3.97E-120 | Pseudomonas virus Pa222       | n/a                                                             | no GO terms                                                     | no GO terms                                                                                                              |
| 20738→21022 | + | hypothetical protein                                          | 285  | 4.53E-61  | Pseudomonas phage phiPA01_EW  | n/a                                                             | no IPS match                                                    | no IPS match                                                                                                             |
| 21022→21906 | + | Exonuclease                                                   | 885  | 0         | Pseudomonas virus Pa222       | n/a                                                             | F:GO:0003677;<br>F:GO:0003824                                   | F:DNA binding;<br>F:catalytic activity                                                                                   |
| 21881→22867 | + | putative tRNA<br>nucleotidyltransferase/poly(A)<br>polymerase | 987  | 0         | Pseudomonas phage U47         | F:GO:0016740                                                    | no IPS match                                                    | no IPS match                                                                                                             |
| 22878→23060 | + | hypothetical protein                                          | 183  | 9.07E-37  | Pseudomonas virus Pa222       | F:GO:0003677;<br>F:GO:0004536;<br>P:GO:0006259                  | no IPS match                                                    | no IPS match                                                                                                             |
| 23053→23814 | + | putative metallophosphoesterase                               | 762  | 0         | Pseudomonas phage phiPA01_EW  | n/a                                                             | no GO terms                                                     | no GO terms                                                                                                              |
| 23811→24029 | + | hypothetical protein                                          | 219  | 7.92E-44  | Pseudomonas phage oldone      | n/a                                                             | no IPS match                                                    | no IPS match                                                                                                             |
| 24033→24242 | + | hypothetical protein                                          | 210  | 7.43E-43  | Pseudomonas phage PaP4        | n/a                                                             | no IPS match                                                    | no IPS match                                                                                                             |
| 24229→24435 | + | hypothetical protein                                          | 207  | 4.35E-22  | Pseudomonas phage phiPA01_302 | n/a                                                             | no GO terms                                                     | no GO terms                                                                                                              |

|             |   |                             |      |           |                               |              |              |              |
|-------------|---|-----------------------------|------|-----------|-------------------------------|--------------|--------------|--------------|
| 24580→24768 | + | hypothetical protein        | 189  | 5.03E-38  | Pseudomonas phage oldone      | n/a          | no IPS match | no IPS match |
| 24813←25169 | - | hypothetical protein        | 357  | 9.40E-80  | Pseudomonas phage PaP4        | n/a          | no IPS match | no IPS match |
| 25184←26071 | - | putative tail fiber protein | 888  | 0         | Pseudomonas phage oldone      | n/a          | no IPS match | no IPS match |
| 26083←29250 | - | hypothetical protein        | 3168 | 0         | Pseudomonas phage oldone      | n/a          | no GO terms  | no GO terms  |
| 29401←30918 | - | hypothetical protein        | 1518 | 0         | Pseudomonas virus Pa223       | n/a          | no GO terms  | no GO terms  |
| 30923←31303 | - | particle protein            | 381  | 5.22E-55  | Pseudomonas phage oldone      | n/a          | no GO terms  | no GO terms  |
| 31303←32244 | - | hypothetical protein        | 942  | 2.27E-154 | Pseudomonas phage oldone      | n/a          | no IPS match | no IPS match |
| 32225←32659 | - | putative acetyl transferase | 435  | 6.67E-104 | Pseudomonas virus Pa222       | F:GO:0016740 | no IPS match | no IPS match |
| 32656←33345 | - | constituent protein         | 690  | 1.02E-142 | Pseudomonas virus Pa222       | n/a          | no IPS match | no IPS match |
| 33342←34883 | - | hypothetical protein        | 1542 | 0         | Pseudomonas phage U47         | n/a          | no IPS match | no IPS match |
| 34892←35539 | - | tail fibers protein         | 648  | 5.33E-138 | Pseudomonas virus Pa222       | n/a          | no GO terms  | no GO terms  |
| 35529←35777 | - | hypothetical protein        | 249  | 1.37E-28  | Pseudomonas phage SL4         | n/a          | no GO terms  | no GO terms  |
| 35761←35973 | - | hypothetical protein        | 213  | 1.71E-38  | Pseudomonas phage Epa4        | n/a          | no GO terms  | no GO terms  |
| 35963←36589 | - | phage particle protein      | 627  | 1.14E-140 | Pseudomonas phage Epa4        | n/a          | no GO terms  | no GO terms  |
| 36593←36913 | - | hypothetical protein        | 321  | 4.93E-72  | Pseudomonas phage Epa4        | n/a          | no IPS match | no IPS match |
| 36962←37915 | - | major head protein          | 954  | 0         | Pseudomonas virus Pa223       | n/a          | no GO terms  | no GO terms  |
| 37934←38926 | - | hypothetical protein        | 993  | 3.98E-152 | Pseudomonas phage oldone      | n/a          | no GO terms  | no GO terms  |
| 38926←39168 | - | hypothetical protein        | 243  | 1.19E-50  | Pseudomonas phage oldone      | n/a          | no IPS match | no IPS match |
| 39171←41291 | - | portal (connector) protein  | 2121 | 0         | Pseudomonas phage LUZ24       | n/a          | no GO terms  | no GO terms  |
| 41291←42739 | - | terminase large subunit     | 1449 | 0         | Pseudomonas phage phiPA01_EW  | F:GO:0005524 | no GO terms  | n/a          |
| 42739←43137 | - | T4-like lysozyme            | 399  | 1.53E-90  | Pseudomonas phage phiPA01_302 | n/a          | no GO terms  | no GO terms  |
| 43169←43627 | - | terminase small subunit     | 459  | 4.18E-107 | Pseudomonas phage oldone      | n/a          | no IPS match | no IPS match |

Supplementary Table S2: A list of the coding sequences (CDSs) and their annotations in the genome of Pseudomonas Phage AUS260

| Gene Domain | Strand | Gene Product                 | Length | e-Value  | Similar To                        | Ontological terms (GO IDs) | InterPro GO IDs | InterPro GO Names |
|-------------|--------|------------------------------|--------|----------|-----------------------------------|----------------------------|-----------------|-------------------|
| 1←954       | -      | replicative primase/helicase | 954    | 0        | Pseudomonas phage vB_PaeS-Yazdi-M | n/a                        | no GO terms     | no GO terms       |
| 957←1328    | -      | hypothetical protein         | 372    | 6.52E-83 | Xanthomonas phage Samson          | n/a                        | no IPS match    | no IPS match      |

|             |   |                                           |      |           |                                   |                                                                                                   |                                                                 |                                                                                                     |
|-------------|---|-------------------------------------------|------|-----------|-----------------------------------|---------------------------------------------------------------------------------------------------|-----------------------------------------------------------------|-----------------------------------------------------------------------------------------------------|
| 1328→1891   | + | MazG-like nucleotide pyrophosphohydrolase | 564  | 5.46E-133 | Pseudomonas phage vB_PaeS-Yazdi-M | F:GO:0016787                                                                                      | no GO terms                                                     | no GO terms                                                                                         |
| 1967→2476   | + | hypothetical protein                      | 510  | 2.95E-102 | Pseudomonas phage PaMx42          | n/a                                                                                               | no IPS match                                                    | no IPS match                                                                                        |
| 2629→3345   | + | putative RecA ATPase                      | 717  | 2.71E-175 | Pseudomonas phage vB_PaeS-Yazdi-M | n/a                                                                                               | no GO terms                                                     | no GO terms                                                                                         |
| 3484→4254   | + | single-stranded DNA-binding protein       | 771  | 1.19E-92  | Xanthomonas phage Samson          | n/a                                                                                               | no GO terms                                                     | no GO terms                                                                                         |
| 4423→4596   | + | hypothetical protein                      | 174  | 4.15E-36  | Pseudomonas phage PaMx42          | n/a                                                                                               | no IPS match                                                    | no IPS match                                                                                        |
| 4765→5868   | + | RecB exonuclease                          | 1104 | 0         | Xanthomonas phage Samson          | n/a                                                                                               | no GO terms                                                     | no GO terms                                                                                         |
| 5861→7516   | + | putative helicase                         | 1656 | 0         | Xanthomonas phage Samson          | F:GO:0003677;<br>F:GO:0004386;<br>F:GO:0005524                                                    | F:GO:0003677;<br>F:GO:0005524;<br>F:GO:0016787                  | F:DNA binding;<br>F:ATP binding;<br>F:hydrolase activity                                            |
| 7521→8684   | + | DNA polymerase III sliding clamp          | 1164 | 0         | Pseudomonas phage vB_PaeS-Yazdi-M | n/a                                                                                               | no GO terms                                                     | no GO terms                                                                                         |
| 8696→10768  | + | DNA polymerase I                          | 2073 | 0         | Pseudomonas phage vB_PaeS-Yazdi-M | F:GO:0000166;<br>F:GO:0003677;<br>F:GO:0003887;<br>P:GO:0006260;<br>P:GO:0039693;<br>P:GO:0071897 | F:GO:0000166;<br>F:GO:0003676;<br>F:GO:0003677;<br>F:GO:0003887 | F:nucleotide binding; F:nucleic acid binding; F:DNA binding; F:DNA-directed DNA polymerase activity |
| 10765←13191 | - | tail fiber protein                        | 2427 | 0         | Xanthomonas phage Samson          | n/a                                                                                               | no GO terms                                                     | no GO terms                                                                                         |
| 13193←14023 | - | virion structural protein                 | 831  | 0         | Xanthomonas phage Samson          | n/a                                                                                               | no GO terms                                                     | no GO terms                                                                                         |
| 14024←15730 | - | virion structural protein                 | 1707 | 0         | Pseudomonas phage vB_PaeS-Yazdi-M | n/a                                                                                               | no IPS match                                                    | no IPS match                                                                                        |
| 16642←17604 | - | virion structural protein                 | 963  | 0         | Pseudomonas phage vB_PaeS-Yazdi-M | n/a                                                                                               | no IPS match                                                    | no IPS match                                                                                        |
| 17604←21431 | - | hypothetical protein                      | 3828 | 0         | Pseudomonas phage vB_PaeS-Yazdi-M | n/a                                                                                               | n/a                                                             | no GO terms                                                                                         |
| 21438←21872 | - | hypothetical protein                      | 435  | 3.26E-99  | Xanthomonas phage Samson          | n/a                                                                                               | no IPS match                                                    | no IPS match                                                                                        |
| 21841←22143 | - | tail assembly chaperone                   | 303  | 1.60E-67  | Pseudomonas phage vB_PaeS-Yazdi-M | n/a                                                                                               | no IPS match                                                    | no IPS match                                                                                        |
| 22206←22634 | - | tail assembly chaperone                   | 429  | 2.43E-99  | Pseudomonas phage vB_PaeS-Yazdi-M | n/a                                                                                               | no IPS match                                                    | no IPS match                                                                                        |
| 22697←24238 | - | major tail protein                        | 1542 | 0         | Pseudomonas phage vB_PaeS-Yazdi-M | n/a                                                                                               | no GO terms                                                     | no GO terms                                                                                         |
| 24252←24707 | - | tail terminator protein                   | 456  | 1.02E-107 | Pseudomonas phage vB_PaeS-Yazdi-M | n/a                                                                                               | no IPS match                                                    | no IPS match                                                                                        |
| 24704←25084 | - | virion structural protein                 | 381  | 1.65E-86  | Pseudomonas phage vB_PaeS-Yazdi-M | n/a                                                                                               | no IPS match                                                    | no IPS match                                                                                        |
| 25088←25606 | - | head-to-tail connector complex protein    | 519  | 7.23E-122 | Pseudomonas phage vB_PaeS-Yazdi-M | n/a                                                                                               | no IPS match                                                    | no IPS match                                                                                        |
| 25619←25978 | - | hypothetical protein                      | 360  | 4.71E-52  | Pseudomonas phage vB_PaeS-Yazdi-M | n/a                                                                                               | no IPS match                                                    | no IPS match                                                                                        |
| 26061←26468 | - | hypothetical protein                      | 408  | 2.22E-41  | Pseudomonas phage vB_PaeS-Yazdi-M | n/a                                                                                               | no GO terms                                                     | no GO terms                                                                                         |

|             |   |                                  |      |           |                                   |                               |                                                                                  |                                                                                                                                                  |
|-------------|---|----------------------------------|------|-----------|-----------------------------------|-------------------------------|----------------------------------------------------------------------------------|--------------------------------------------------------------------------------------------------------------------------------------------------|
| 26537←27511 | - | major head protein               | 975  | 0         | Pseudomonas phage PaMx42          | n/a                           | no IPS match                                                                     | no IPS match                                                                                                                                     |
| 27524←28234 | - | scaffold protein                 | 711  | 1.08E-158 | Pseudomonas phage vB_PaeS-Yazdi-M | n/a                           | no GO terms                                                                      | no GO terms                                                                                                                                      |
| 28272←29366 | - | head morphogenesis protein       | 1095 | 0         | Pseudomonas phage vB_PaeS-Yazdi-M | n/a                           | no GO terms                                                                      | no GO terms                                                                                                                                      |
| 29369←30883 | - | portal protein                   | 1515 | 0         | Xanthomonas phage Samson          | n/a                           | no GO terms                                                                      | no GO terms                                                                                                                                      |
| 30897←32510 | - | terminase large subunit          | 1614 | 0         | Xanthomonas phage Samson          | n/a                           | no GO terms                                                                      | no GO terms                                                                                                                                      |
| 32491←32979 | - | putative terminase small subunit | 489  | 4.83E-86  | Pseudomonas phage PaMx42          | n/a                           | no IPS match                                                                     | no IPS match                                                                                                                                     |
| 33231←33545 | - | putative Rz protein              | 315  | 3.75E-49  | Pseudomonas phage PaMx42          | C:GO:0016021                  | no GO terms                                                                      | no GO terms                                                                                                                                      |
| 33545←34105 | - | SAR endolysin glycosyl hydrolase | 561  | 6.23E-119 | Pseudomonas phage PaMx42          | F:GO:0016787                  | no GO terms                                                                      | no GO terms                                                                                                                                      |
| 34062←34352 | - | putative holin                   | 291  | 1.74E-61  | Pseudomonas phage PaMx42          | C:GO:0016021                  | no GO terms                                                                      | no GO terms                                                                                                                                      |
| 34352←34720 | - | hypothetical protein             | 369  | 1.39E-74  | Pseudomonas phage PaMx42          | C:GO:0016021                  | no GO terms                                                                      | no GO terms                                                                                                                                      |
| 34861←35436 | - | hypothetical protein             | 576  | 5.22E-106 | Pseudomonas phage PaMx42          | n/a                           | no GO terms                                                                      | no GO terms                                                                                                                                      |
| 35521←35730 | - | hypothetical protein             | 210  | 4.43E-26  | Pseudomonas phage PaMx42          | n/a                           | no GO terms                                                                      | no GO terms                                                                                                                                      |
| 35775←36149 | - | hypothetical protein             | 375  | 3.14E-84  | Pseudomonas phage PaMx42          | n/a                           | no IPS match                                                                     | no IPS match                                                                                                                                     |
| 36155←36631 | - | deoxycytidylate deaminase        | 477  | 4.08E-112 | Xanthomonas phage Samson          | F:GO:0008270;<br>F:GO:0016787 | F:GO:0003824;<br>F:GO:0004132;<br>P:GO:0006220;<br>F:GO:0008270;<br>F:GO:0016787 | F:catalytic activity;<br>F:dCMP deaminase activity;<br>P:pyrimidine nucleotide metabolic process;<br>F:zinc ion binding;<br>F:hydrolase activity |
| 36628←36861 | - | hypothetical protein             | 234  | 5.95E-20  | Pseudomonas phage vB_PaeS-Yazdi-M | n/a                           | no GO terms                                                                      | no GO terms                                                                                                                                      |
| 36924←37223 | - | hypothetical protein             | 300  | 3.01E-56  | Pseudomonas phage vB_PaeS-Yazdi-M | C:GO:0016021                  | no GO terms                                                                      | no GO terms                                                                                                                                      |
| 37237←37542 | - | hypothetical protein             | 306  | 1.60E-51  | Pseudomonas phage vB_PaeS-Yazdi-M | n/a                           | no GO terms                                                                      | no GO terms                                                                                                                                      |
| 37599←37772 | - | hypothetical protein             | 174  | 1.26E-32  | Pseudomonas phage vB_PaeS-Yazdi-M | n/a                           | no IPS match                                                                     | no IPS match                                                                                                                                     |
| 37762←37968 | - | hypothetical protein             | 207  | 1.12E-42  | Pseudomonas phage vB_PaeS-Yazdi-M | n/a                           | no IPS match                                                                     | no IPS match                                                                                                                                     |
| 37968←38213 | - | hypothetical protein             | 246  | 4.43E-49  | Pseudomonas phage vB_PaeS-Yazdi-M | n/a                           | no IPS match                                                                     | no IPS match                                                                                                                                     |
| 38198←38734 | - | hypothetical protein             | 537  | 1.21E-118 | Pseudomonas phage vB_PaeS-Yazdi-M | n/a                           | F:GO:0003676;<br>F:GO:0004518                                                    | F:nucleic acid binding; F:nuclease activity                                                                                                      |
| 38731←38952 | - | hypothetical protein             | 222  | 9.29E-45  | Xanthomonas phage Samson          | n/a                           | no IPS match                                                                     | no IPS match                                                                                                                                     |

|             |   |                      |     |          |                                   |     |              |              |
|-------------|---|----------------------|-----|----------|-----------------------------------|-----|--------------|--------------|
| 39010←39384 | - | hypothetical protein | 375 | 6.82E-56 | Pseudomonas phage vB_PaeS-Yazdi-M | n/a | no IPS match | no IPS match |
| 39457←39699 | - | hypothetical protein | 243 | 2.38E-51 | Pseudomonas phage PaMx42          | n/a | no GO terms  | no GO terms  |
| 39841←40143 | - | hypothetical protein | 303 | 1.92E-68 | Xanthomonas phage Samson          | n/a | no IPS match | no IPS match |
| 40492←40755 | - | hypothetical protein | 264 | 2.99E-55 | Pseudomonas phage PaMx42          | n/a | no IPS match | no IPS match |
| 40772←41272 | - | hypothetical protein | 501 | 1.15E-93 | Xanthomonas phage Samson          | n/a | no GO terms  | no GO terms  |
| 41341←41538 | - | hypothetical protein | 198 | 5.68E-39 | Xanthomonas phage Samson          | n/a | no IPS match | no IPS match |
| 41535←41735 | - | hypothetical protein | 201 | 8.01E-39 | Xanthomonas phage Samson          | n/a | no IPS match | no IPS match |

**Supplementary Table S3: A list of the coding sequences (CDSs) and their annotations in the genome of Pseudomonas Phage AUS301**

| Gene Domain | Strand | Gene Product                | Length | e-Value   | Similar To                        | Ontological terms (GO IDs) | InterPro GO IDs | InterPro GO Names |
|-------------|--------|-----------------------------|--------|-----------|-----------------------------------|----------------------------|-----------------|-------------------|
| 2←169       | -      | hypothetical protein        | 168    | 1.84E-32  | Pseudomonas phage vB_PaeM_SCUT-S1 | n/a                        | no GO terms     | no GO terms       |
| 172←951     | -      | hypothetical protein        | 780    | 0         | Pseudomonas phage KPP12 DNA       | n/a                        | no GO terms     | no GO terms       |
| 1038←1475   | -      | hypothetical protein        | 438    | 5.95E-85  | Pseudomonas phage Epa20           | C:GO:0016021               | no GO terms     | n/a               |
| 1492←2079   | -      | hypothetical protein        | 588    | 1.82E-144 | Pseudomonas phage Epa21           | n/a                        | no IPS match    | no IPS match      |
| 2181←3113   | -      | hypothetical protein        | 933    | 0         | Pseudomonas phage vB_PaeM_USP_3   | n/a                        | no GO terms     | no GO terms       |
| 3217←3564   | -      | Phage protein               | 348    | 2.44E-76  | Pseudomonas phage PHW2            | n/a                        | no GO terms     | no GO terms       |
| 3813←4124   | -      | Phage protein               | 312    | 1.60E-67  | Pseudomonas phage PASA16          | n/a                        | no IPS match    | no IPS match      |
| 4330←4653   | -      | Phage protein               | 324    | 4.38E-75  | Pseudomonas phage vB_PaeM_E217    | n/a                        | no GO terms     | no GO terms       |
| 4685←5086   | -      | hypothetical protein        | 402    | 6.72E-92  | Pseudomonas phage PHW2            | n/a                        | no IPS match    | no IPS match      |
| 5267→7564   | +      | hypothetical protein        | 2298   | 0         | Pseudomonas phage Epa25           | n/a                        | no GO terms     | no GO terms       |
| 7564→8400   | +      | minor capsid protein        | 837    | 0         | Pseudomonas phage Epa15           | n/a                        | no GO terms     | no GO terms       |
| 8419→8625   | +      | Phage protein               | 207    | 1.73E-28  | Pseudomonas phage crassa          | n/a                        | no GO terms     | no GO terms       |
| 8622→8762   | +      | putative membrane protein   | 141    | 5.61E-23  | Pseudomonas phage crassa          | C:GO:0016021               | no GO terms     | n/a               |
| 9275→10708  | +      | putative structural protein | 1434   | 0         | Pseudomonas phage vB_PaeM_E217    | n/a                        | no GO terms     | no GO terms       |
| 10712→11347 | +      | putative structural protein | 636    | 1.46E-132 | Pseudomonas phage goonie          | n/a                        | no IPS match    | no IPS match      |
| 11357→12505 | +      | capsid and scaffold protein | 1149   | 0         | Pseudomonas phage crassa          | n/a                        | no IPS match    | no IPS match      |
| 12607→13044 | +      | hypothetical protein        | 438    | 1.24E-103 | Pseudomonas phage vB_PaeM_USP_3   | n/a                        | no IPS match    | no IPS match      |



|             |   |                               |      |           |                                 |                                                |                                                |                                                                                                           |
|-------------|---|-------------------------------|------|-----------|---------------------------------|------------------------------------------------|------------------------------------------------|-----------------------------------------------------------------------------------------------------------|
| 13059→13526 | + | structural protein            | 468  | 4.17E-78  | Pseudomonas virus PA8P1         | n/a                                            | no GO terms                                    | no GO terms                                                                                               |
| 13550→13921 | + | putative structural protein   | 372  | 2.68E-83  | Pseudomonas phage vB_PaeM_SMS29 | n/a                                            | no IPS match                                   | no IPS match                                                                                              |
| 13929→14480 | + | structural protein            | 552  | 1.92E-133 | Pseudomonas phage PASA16        | n/a                                            | no IPS match                                   | no IPS match                                                                                              |
| 14477→15058 | + | phage protein                 | 582  | 9.40E-126 | Pseudomonas phage PASA16        | n/a                                            | no IPS match                                   | no IPS match                                                                                              |
| 15074→16588 | + | putative structural protein   | 1515 | 0         | Pseudomonas phage Epa7          | n/a                                            | no GO terms                                    | no GO terms                                                                                               |
| 16647→17099 | + | tail fiber protein            | 453  | 3.85E-103 | Pseudomonas phage Epa13         | n/a                                            | no IPS match                                   | no IPS match                                                                                              |
| 17099→17422 | + | putative structural protein   | 324  | 4.06E-75  | Pseudomonas phage Epa13         | n/a                                            | no IPS match                                   | no IPS match                                                                                              |
| 17419→17769 | + | putative structural protein   | 351  | 5.76E-78  | Pseudomonas phage PASA16        | n/a                                            | no IPS match                                   | no IPS match                                                                                              |
| 17771→18202 | + | putative structural protein   | 432  | 2.91E-32  | Pseudomonas phage KPP22M1 DNA   | n/a                                            | no GO terms                                    | no GO terms                                                                                               |
| 18212→18715 | + | putative structural protein   | 504  | 9.16E-115 | Pseudomonas phage antinowhere   | n/a                                            | no IPS match                                   | no IPS match                                                                                              |
| 18715→19254 | + | putative structural protein   | 540  | 5.78E-127 | Pseudomonas phage Epa13         | n/a                                            | no GO terms                                    | no GO terms                                                                                               |
| 19263→19856 | + | tail fiber protein            | 594  | 3.11E-139 | Pseudomonas phage antinowhere   | n/a                                            | no IPS match                                   | no IPS match                                                                                              |
| 19866→20294 | + | Phage protein                 | 429  | 1.63E-100 | Pseudomonas phage antinowhere   | n/a                                            | no IPS match                                   | no IPS match                                                                                              |
| 20298→22874 | + | putative lytic tail protein   | 2577 | 0         | Pseudomonas phage S50 DNA       | P:GO:0000270;<br>F:GO:0008933;<br>C:GO:0016020 | P:GO:0000270;<br>F:GO:0008933;<br>C:GO:0016020 | n/a                                                                                                       |
| 22874→23737 | + | putative structural protein   | 864  | 0         | Pseudomonas phage Epa7          | n/a                                            | no IPS match                                   | no IPS match                                                                                              |
| 23737→24270 | + | hypothetical protein          | 534  | 4.16E-127 | Pseudomonas phage Epa7          | n/a                                            | no IPS match                                   | no IPS match                                                                                              |
| 24326→24991 | + | hypothetical protein          | 666  | 1.74E-134 | Pseudomonas phage Epa7          | n/a                                            | no GO terms                                    | no GO terms                                                                                               |
| 25047→26300 | + | putative structural protein   | 1254 | 0         | Pseudomonas phage PHW2          | n/a                                            | no GO terms                                    | no GO terms                                                                                               |
| 26297→27811 | + | Phage protein                 | 1515 | 0         | Pseudomonas phage S12-3 DNA     | n/a                                            | no GO terms                                    | no GO terms                                                                                               |
| 27789→30710 | + | hypothetical protein          | 2922 | 0         | Pseudomonas phage S50 DNA       | n/a                                            | no IPS match                                   | no IPS match                                                                                              |
| 30712→31140 | + | putative tail fiber component | 429  | 3.02E-99  | Pseudomonas phage chunk         | n/a                                            | no IPS match                                   | no IPS match                                                                                              |
| 31140→31802 | + | putative endolysin            | 663  | 9.26E-162 | Pseudomonas phage PaGU11 DNA    | F:GO:0004568;<br>P:GO:0006032;<br>P:GO:0016998 | F:GO:0004568;<br>P:GO:0006032;<br>P:GO:0016998 | F:chitinase activity;<br>P:chitin catabolic<br>process; P:cell wall<br>macromolecule<br>catabolic process |
| 31827←32078 | - | phage protein                 | 252  | 1.54E-41  | Pseudomonas phage Epa7          | n/a                                            | no IPS match                                   | no IPS match                                                                                              |
| 32358←33269 | - | DNA ligase                    | 912  | 0         | Pseudomonas phage Epa7          | F:GO:0003910;<br>F:GO:0005524;                 | F:GO:0003910;<br>F:GO:0005524;                 | F:DNA ligase (ATP)<br>activity; F:ATP                                                                     |

|             |   |                                             |      |           |                                     |                                                                                  |                                                |                                                                                                                                |
|-------------|---|---------------------------------------------|------|-----------|-------------------------------------|----------------------------------------------------------------------------------|------------------------------------------------|--------------------------------------------------------------------------------------------------------------------------------|
|             |   |                                             |      |           |                                     | P:GO:0006266;<br>P:GO:0006281;<br>P:GO:0006310                                   | P:GO:0006281;<br>P:GO:0006310                  | binding; P:DNA<br>repair; P:DNA<br>recombination                                                                               |
| 33324←33878 | - | putative DNA-binding protein                | 555  | 1.10E-116 | Pseudomonas phage PaGU11 DNA        | F:GO:0003677                                                                     | no GO terms                                    | n/a                                                                                                                            |
| 33875←34480 | - | hypothetical protein                        | 606  | 2.99E-101 | Pseudomonas phage vB_PaeM_LS1       | C:GO:0016021                                                                     | no GO terms                                    | n/a                                                                                                                            |
| 34534←35433 | - | phage protein                               | 900  | 0         | Pseudomonas phage PHW2              | n/a                                                                              | no GO terms                                    | no GO terms                                                                                                                    |
| 35522←36142 | - | phage protein                               | 621  | 5.25E-114 | Pseudomonas phage vB_PaeM_LS1       | n/a                                                                              | no GO terms                                    | no GO terms                                                                                                                    |
| 36237←37796 | - | DNA helicase                                | 1560 | 0         | Pseudomonas phage vB_PaeM_SCUT-S1   | F:GO:0004386;<br>F:GO:0005524                                                    | F:GO:0005524;<br>F:GO:0070615                  | F:ATP binding;<br>F:nucleosome-<br>dependent ATPase<br>activity                                                                |
| 37793←38203 | - | putative DNA helicase                       | 411  | 1.50E-94  | Pseudomonas phage PaGU11 DNA        | F:GO:0004386                                                                     | no IPS match                                   | no IPS match                                                                                                                   |
| 38196←41306 | - | DNA polymerase III alpha subunit            | 3111 | 0         | Pseudomonas phage Epa20             | F:GO:0003887;<br>P:GO:0006260;<br>F:GO:0008408;<br>P:GO:0071897;<br>P:GO:0090305 | P:GO:0006260;<br>F:GO:0008408                  | P:DNA replication;<br>F:3'-5' exonuclease<br>activity                                                                          |
| 41303←41857 | - | putative DNA polymerase III epsilon subunit | 555  | 4.31E-135 | Pseudomonas phage vB_PaeM_SCUT-S1   | F:GO:0003676                                                                     | F:GO:0003676                                   | no IPS match                                                                                                                   |
| 41933←42949 | - | putative polynucleotide kinase              | 1017 | 0         | Pseudomonas phage vB_PaeM_LS1       | F:GO:0016301;<br>P:GO:0016310                                                    | no GO terms                                    | no GO terms                                                                                                                    |
| 42952←43143 | - | hypothetical protein                        | 192  | 1.65E-35  | Pseudomonas phage PASA16            | n/a                                                                              | no IPS match                                   | no IPS match                                                                                                                   |
| 43145←44062 | - | hypothetical protein                        | 918  | 0         | Pseudomonas phage vB_PaeM_CEB_DP1   | n/a                                                                              | P:GO:0006231;<br>F:GO:0050660;<br>F:GO:0050797 | P:dTMP biosynthetic<br>process; F:flavin<br>adenine<br>dinucleotide<br>binding;<br>F:thymidylate<br>synthase (FAD)<br>activity |
| 44062←44268 | - | hypothetical protein                        | 207  | 4.27E-41  | Pseudomonas phage vB_PaeM_PA01_Ab27 | n/a                                                                              | no GO terms                                    | no GO terms                                                                                                                    |
| 44276←44500 | - | phage protein                               | 225  | 6.72E-47  | Pseudomonas phage PA01              | n/a                                                                              | no IPS match                                   | no IPS match                                                                                                                   |
| 44533←44751 | - | tail assembly protein                       | 219  | 4.08E-46  | Pseudomonas phage vB_PaeM_SMS29     | n/a                                                                              | no IPS match                                   | no IPS match                                                                                                                   |
| 44735←44953 | - | phage protein                               | 219  | 2.22E-32  | Pseudomonas virus Pa204             | n/a                                                                              | no IPS match                                   | no IPS match                                                                                                                   |
| 44953←45183 | - | phage protein                               | 231  | 1.56E-49  | Pseudomonas virus Pa204             | n/a                                                                              | no IPS match                                   | no IPS match                                                                                                                   |
| 45271←46272 | - | hypothetical protein                        | 1002 | 0         | Pseudomonas virus Pa204             | n/a                                                                              | no GO terms                                    | no GO terms                                                                                                                    |

|             |   |                                    |      |          |                          |              |              |              |
|-------------|---|------------------------------------|------|----------|--------------------------|--------------|--------------|--------------|
| 46376←47269 | - | structural protein                 | 894  | 5.22E-66 | Pseudomonas virus Pa204  | n/a          | no GO terms  | no GO terms  |
| 47427←48614 | - | 5' to 3' DNA helicase-like protein | 1188 | 0        | Pseudomonas phage Epa7   | F:GO:0004386 | no GO terms  | no GO terms  |
| 48601←49023 | - | hypothetical protein               | 423  | 5.49E-98 | Pseudomonas phage Epa25  | n/a          | no IPS match | no IPS match |
| 49120←49350 | - | hypothetical protein               | 231  | 9.89E-42 | Pseudomonas phage PASA16 | n/a          | no GO terms  | no GO terms  |

Supplementary Table S4: A list of the coding sequences (CDSs) and their annotations in the genome of Pseudomonas Phage AUS391

| Gene Domain | Strand | Gene Product                      | Length | e-Value   | Similar To                      | Ontological terms (GO IDs) | InterPro GO IDs | InterPro GO Names |
|-------------|--------|-----------------------------------|--------|-----------|---------------------------------|----------------------------|-----------------|-------------------|
| 2←106       | -      | hypothetical protein              | 105    | 4.67E-14  | Pseudomonas phage PASA16        | n/a                        | no GO terms     | no GO terms       |
| 103←882     | -      | hypothetical protein              | 780    | 0         | Pseudomonas phage KPP22M1       | n/a                        | no GO terms     | no GO terms       |
| 969←1406    | -      | hypothetical protein              | 438    | 6.71E-98  | Pseudomonas phage KPP22M1       | C:GO:0016021               | no GO terms     | no GO terms       |
| 1423←2010   | -      | hypothetical protein              | 588    | 8.81E-145 | Pseudomonas phage KPP22M1       | n/a                        | no IPS match    | no IPS match      |
| 2112←3044   | -      | hypothetical protein              | 933    | 0         | Pseudomonas phage NH-4          | n/a                        | no GO terms     | no GO terms       |
| 3148←3495   | -      | hypothetical protein              | 348    | 2.14E-76  | Pseudomonas phage PASA16        | n/a                        | no GO terms     | no GO terms       |
| 3744←4055   | -      | Phage protein                     | 312    | 1.60E-67  | Pseudomonas phage PASA16        | n/a                        | no IPS match    | no IPS match      |
| 4061←4264   | -      | hypothetical protein              | 204    | 8.76E-41  | Pseudomonas phage PASA16        | n/a                        | no GO terms     | no GO terms       |
| 4261←4584   | -      | phage protein                     | 324    | 6.95E-75  | n/a                             | n/a                        | no GO terms     | no GO terms       |
| 4616←5017   | -      | hypothetical protein              | 402    | 6.72E-92  | Pseudomonas phage PHW2          | n/a                        | no IPS match    | no IPS match      |
| 5198→7495   | +      | DUF1073 domain-containing protein | 2298   | 0         | Pseudomonas phage Epa25         | n/a                        | no GO terms     | no GO terms       |
| 7495→8331   | +      | minor capsid protein              | 837    | 0         | Pseudomonas phage BrSP1         | n/a                        | no GO terms     | no GO terms       |
| 8350→8556   | +      | hypothetical protein              | 207    | 3.13E-27  | Pseudomonas phage PASA16        | n/a                        | no GO terms     | no GO terms       |
| 8553→8693   | +      | hypothetical protein              | 141    | 6.55E-23  | Pseudomonas phage PASA16        | C:GO:0016021               | no GO terms     | no GO terms       |
| 9246→10640  | +      | putative structural protein       | 1395   | 0         | Pseudomonas phage goonie        | n/a                        | no GO terms     | no GO terms       |
| 10644→11279 | +      | structural protein                | 636    | 1.39E-147 | Pseudomonas phage vB_PaeM_USP_3 | n/a                        | no IPS match    | no IPS match      |
| 11289→12437 | +      | capsid and scaffold protein       | 1149   | 0         | Pseudomonas virus Pa204         | n/a                        | no IPS match    | no IPS match      |
| 12539→12976 | +      | hypothetical protein              | 438    | 1.31E-103 | Pseudomonas phage SL1           | n/a                        | no IPS match    | no IPS match      |
| 12991→13458 | +      | putative structural protein       | 468    | 2.73E-93  | Pseudomonas phage willy         | n/a                        | no GO terms     | no GO terms       |
| 13455→13853 | +      | putative structural protein       | 399    | 3.77E-91  | Pseudomonas phage crassa        | n/a                        | no IPS match    | no IPS match      |

|             |   |                             |      |           |                                     |                                                                                  |                                                                 |                                                                                                           |
|-------------|---|-----------------------------|------|-----------|-------------------------------------|----------------------------------------------------------------------------------|-----------------------------------------------------------------|-----------------------------------------------------------------------------------------------------------|
| 13861→14412 | + | structural protein          | 552  | 1.03E-132 | Pseudomonas phage PASA16            | n/a                                                                              | no IPS match                                                    | no IPS match                                                                                              |
| 14409→14990 | + | phage protein               | 582  | 9.40E-126 | Pseudomonas phage PASA16            | n/a                                                                              | no IPS match                                                    | no IPS match                                                                                              |
| 15006→16520 | + | putative structural protein | 1515 | 0         | Pseudomonas phage Epa7              | n/a                                                                              | no GO terms                                                     | no GO terms                                                                                               |
| 16579→17031 | + | tail fiber protein          | 453  | 3.85E-103 | Pseudomonas phage Epa13             | n/a                                                                              | no IPS match                                                    | no IPS match                                                                                              |
| 17031→17354 | + | putative structural protein | 324  | 4.06E-75  | Pseudomonas phage Epa13             | n/a                                                                              | no IPS match                                                    | no IPS match                                                                                              |
| 17351→17701 | + | putative structural protein | 351  | 5.76E-78  | Pseudomonas virus Pa193             | n/a                                                                              | no IPS match                                                    | no IPS match                                                                                              |
| 17703→18134 | + | hypothetical protein        | 432  | 2.04E-33  | Pseudomonas phage PASA16            | n/a                                                                              | no GO terms                                                     | no GO terms                                                                                               |
| 18144→18647 | + | putative structural protein | 504  | 8.67E-115 | Pseudomonas phage Epa25             | n/a                                                                              | no IPS match                                                    | no IPS match                                                                                              |
| 18782→19186 | + | structural protein          | 405  | 1.91E-93  | Pseudomonas phage BrSP1             | n/a                                                                              | no IPS match                                                    | no IPS match                                                                                              |
| 19195→19788 | + | tail fiber protein          | 594  | 3.83E-139 | Pseudomonas phage vB_PaeM_CEB_DP1   | n/a                                                                              | no IPS match                                                    | no IPS match                                                                                              |
| 19798→20226 | + | hypothetical protein        | 429  | 9.61E-101 | Pseudomonas virus Pa193             | n/a                                                                              | no IPS match                                                    | no IPS match                                                                                              |
| 20230→22806 | + | putative lytic tail protein | 2577 | 0         | Pseudomonas phage sortsol           | P:GO:0000270;<br>F:GO:0008933;<br>C:GO:0016020                                   | no GO terms                                                     | no GO terms                                                                                               |
| 22806→23669 | + | putative structural protein | 864  | 0         | Pseudomonas phage Epa10             | n/a                                                                              | no IPS match                                                    | no IPS match                                                                                              |
| 23669→24202 | + | hypothetical protein        | 534  | 6.37E-128 | Pseudomonas phage debbie            | n/a                                                                              | no IPS match                                                    | no IPS match                                                                                              |
| 24258→24923 | + | baseplate protein           | 666  | 5.39E-128 | Pseudomonas phage Epa20             | F:GO:0046872                                                                     | no GO terms                                                     | no GO terms                                                                                               |
| 24980→26233 | + | putative baseplate protein  | 1254 | 0         | Pseudomonas phage vB_PaeM_PAO1_Ab29 | n/a                                                                              | no GO terms                                                     | no GO terms                                                                                               |
| 26230→27744 | + | virion protein              | 1515 | 0         | Pseudomonas phage KPP22M1 DNA       | n/a                                                                              | no GO terms                                                     | no GO terms                                                                                               |
| 27749→30637 | + | hypothetical protein        | 2889 | 0         | Pseudomonas virus PA8P1             | n/a                                                                              | no GO terms                                                     | no GO terms                                                                                               |
| 30639→31067 | + | tail fiber component        | 429  | 1.02E-98  | Pseudomonas virus PA8P1             | n/a                                                                              | no IPS match                                                    | no IPS match                                                                                              |
| 31067→31729 | + | lytic enzyme                | 663  | 9.46E-162 | Pseudomonas phage PASA16            | F:GO:0004568;<br>P:GO:0006032;<br>P:GO:0016998                                   | F:GO:0004568;<br>P:GO:0006032;<br>P:GO:0016998                  | F:chitinase activity;<br>P:chitin catabolic<br>process; P:cell wall<br>macromolecule<br>catabolic process |
| 31753←32004 | - | phage protein               | 252  | 1.54E-41  | Pseudomonas phage vB_PaeM_E215      | n/a                                                                              | no IPS match                                                    | no IPS match                                                                                              |
| 32284←33195 | - | DNA ligase                  | 912  | 0         | Pseudomonas phage vB_PaeM_CEB_DP1   | F:GO:0003910;<br>F:GO:0005524;<br>P:GO:0006266;<br>P:GO:0006281;<br>P:GO:0006310 | F:GO:0003910;<br>F:GO:0005524;<br>P:GO:0006281;<br>P:GO:0006310 | F:DNA ligase (ATP)<br>activity; F:ATP<br>binding; P:DNA<br>repair; P:DNA<br>recombination                 |

|             |   |                                             |      |           |                                           |                                                                                  |                                                |                                                                                                           |
|-------------|---|---------------------------------------------|------|-----------|-------------------------------------------|----------------------------------------------------------------------------------|------------------------------------------------|-----------------------------------------------------------------------------------------------------------|
| 33250←33804 | - | putative DNA-binding protein                | 555  | 1.10E-116 | Pseudomonas phage vB_PaeM_USP_3           | F:GO:0003677                                                                     | no IPS match                                   | no IPS match                                                                                              |
| 33801←34406 | - | hypothetical protein                        | 606  | 2.99E-101 | Pseudomonas virus Pa193                   | C:GO:0016021                                                                     | no GO terms                                    | no GO terms                                                                                               |
| 34460←35359 | - | phage protein                               | 900  | 0         | Pseudomonas phage PASA16                  | n/a                                                                              | no GO terms                                    | no GO terms                                                                                               |
| 35448←36068 | - | hypothetical protein                        | 621  | 6.74E-114 | Pseudomonas phage Epa7                    | n/a                                                                              | no GO terms                                    | no GO terms                                                                                               |
| 36163←37722 | - | DNA helicase                                | 1560 | 0         | Pseudomonas phage DL68                    | F:GO:0005524                                                                     | no IPS match                                   | no IPS match                                                                                              |
| 37719←38129 | - | putative DNA helicase                       | 411  | 1.24E-94  | Pseudomonas virus Pa193                   | F:GO:0004386                                                                     | no IPS match                                   | no IPS match                                                                                              |
| 38122←41229 | - | DNA polymerase III alpha subunit            | 3108 | 0         | Pseudomonas phage DL68                    | F:GO:0003887;<br>P:GO:0006260;<br>F:GO:0008408;<br>P:GO:0071897;<br>P:GO:0090305 | P:GO:0006260;<br>F:GO:0008408                  | P:DNA replication;<br>F:3'-5' exonuclease activity                                                        |
| 41229←41783 | - | putative DNA polymerase III epsilon subunit | 555  | 4.31E-135 | Pseudomonas phage vB_PaeM_SCUT-S1         | F:GO:0003676                                                                     | no IPS match                                   | no IPS match                                                                                              |
| 41859←42875 | - | 3'-phosphatase, 5'-polynucleotide kinase    | 1017 | 0         | Pseudomonas phage Epa22                   | F:GO:0016301;<br>P:GO:0016310                                                    | no IPS match                                   | no IPS match                                                                                              |
| 42878←43069 | - | hypothetical protein                        | 192  | 1.65E-35  | Pseudomonas phage PASA16                  | n/a                                                                              | no IPS match                                   | no IPS match                                                                                              |
| 43071←43988 | - | thymidylate synthase                        | 918  | 0         | Pseudomonas phage jett                    | P:GO:0006231;<br>P:GO:0032259;<br>F:GO:0050660;<br>F:GO:0050797                  | P:GO:0006231;<br>F:GO:0050660;<br>F:GO:0050797 | P:dTMP biosynthetic process; F:flavin adenine dinucleotide binding; F:thymidylate synthase (FAD) activity |
| 43988←44194 | - | phage protein                               | 207  | 5.04E-41  | Pseudomonas phage Epa10                   | n/a                                                                              | no GO terms                                    | no GO terms                                                                                               |
| 44202←44432 | - | hypothetical protein                        | 231  | 1.61E-47  | Pseudomonas phage Epa13                   | n/a                                                                              | no IPS match                                   | no IPS match                                                                                              |
| 44465←44683 | - | putative tail assembly protein              | 219  | 5.08E-46  | Pseudomonas phage Epa13                   | n/a                                                                              | no IPS match                                   | no IPS match                                                                                              |
| 44667←44885 | - | hypothetical protein                        | 219  | 4.52E-33  | Pseudomonas phage Epa13                   | n/a                                                                              | no IPS match                                   | no IPS match                                                                                              |
| 44885←45115 | - | hypothetical protein                        | 231  | 2.01E-49  | Pseudomonas phage goonie, complete genome | n/a                                                                              | no IPS match                                   | no IPS match                                                                                              |
| 45203←46204 | - | hypothetical protein                        | 1002 | 0         | Pseudomonas phage shane                   | n/a                                                                              | no GO terms                                    | no GO terms                                                                                               |
| 46309←47202 | - | hypothetical protein                        | 894  | 7.57E-65  | Pseudomonas virus Pa204                   | n/a                                                                              | no GO terms                                    | no GO terms                                                                                               |
| 47363←48550 | - | DNA helicase                                | 1188 | 0         | Pseudomonas virus Pa193                   | F:GO:0004386                                                                     | no GO terms                                    | no GO terms                                                                                               |
| 48537←48959 | - | hypothetical protein                        | 423  | 1.00E-97  | Pseudomonas phage jett                    | n/a                                                                              | no IPS match                                   | no IPS match                                                                                              |

|             |   |                           |      |           |                                     |                               |              |              |
|-------------|---|---------------------------|------|-----------|-------------------------------------|-------------------------------|--------------|--------------|
| 49128→49913 | + | putative endonuclease     | 786  | 5.85E-180 | Pseudomonas phage vB_PaeM_SCUT-S1   | F:GO:0004519;<br>P:GO:0090305 | no IPS match | no IPS match |
| 49924→51153 | + | hypothetical protein      | 1230 | 0         | Pseudomonas phage vB_PaeM_E215      | n/a                           | no GO terms  | no GO terms  |
| 51177→51626 | + | hypothetical protein      | 450  | 8.07E-106 | Pseudomonas virus Pa193             | n/a                           | no IPS match | no IPS match |
| 51623→52699 | + | putative DNA primase      | 1077 | 0         | Pseudomonas phage vB_PaeM_PAO1_Ab29 | n/a                           | no GO terms  | no GO terms  |
| 52705→52890 | + | putative membrane protein | 186  | 3.35E-14  | Pseudomonas phage crassa            | n/a                           | no GO terms  | no GO terms  |
| 53038→54777 | + | DNA primase               | 1740 | 0         | Pseudomonas virus Pa193             | n/a                           | no GO terms  | no GO terms  |
| 55749→56318 | + | hypothetical protein      | 570  | 8.58E-123 | Pseudomonas phage Epa20             | n/a                           | no GO terms  | no GO terms  |
| 56485←57099 | - | hypothetical protein      | 615  | 8.65E-105 | Pseudomonas phage shane             | n/a                           | no GO terms  | no GO terms  |
| 57291←57977 | - | hypothetical protein      | 687  | 2.90E-111 | Pseudomonas phage PaGU11 DNA        | n/a                           | no GO terms  | no GO terms  |
| 57989←58300 | - | hypothetical protein      | 312  | 1.61E-70  | Pseudomonas phage vB_PaeM_LS1       | n/a                           | no IPS match | no IPS match |
| 58353←58583 | - | phage protein             | 231  | 7.78E-46  | Pseudomonas phage PaGU11 DNA        | n/a                           | no IPS match | no IPS match |
| 58639←58863 | - | hypothetical protein      | 225  | 7.62E-46  | Pseudomonas phage goodold           | n/a                           | no IPS match | no IPS match |
| 58928←59254 | - | hypothetical protein      | 327  | 5.29E-72  | Pseudomonas phage vB_PaeM_LS1       | n/a                           | no IPS match | no IPS match |
| 59255←59899 | - | hypothetical protein      | 645  | 1.20E-129 | Pseudomonas virus Pa193             | n/a                           | no GO terms  | no GO terms  |
| 59931←60143 | - | hypothetical protein      | 213  | 1.82E-45  | Pseudomonas virus Pa204             | n/a                           | no IPS match | no IPS match |
| 60140←60340 | - | hypothetical protein      | 201  | 1.11E-40  | Pseudomonas virus Pa204             | C:GO:0016021                  | no IPS match | no IPS match |
| 60337←60552 | - | hypothetical protein      | 216  | 1.33E-43  | Pseudomonas virus Pa204             | n/a                           | no IPS match | no IPS match |
| 60549←60749 | - | hypothetical protein      | 201  | 6.68E-40  | Pseudomonas virus Pa204             | n/a                           | no GO terms  | no GO terms  |
| 60746←60997 | - | hypothetical protein      | 252  | 5.96E-54  | Pseudomonas virus Pa204             | n/a                           | no IPS match | no IPS match |
| 61111←61323 | - | hypothetical protein      | 213  | 1.69E-41  | Pseudomonas phage R12 DNA           | n/a                           | no IPS match | no IPS match |
| 61367←61627 | - | hypothetical protein      | 261  | 2.60E-48  | Pseudomonas phage PASA16            | n/a                           | no IPS match | no IPS match |
| 61678←61866 | - | hypothetical protein      | 189  | 5.43E-39  | Pseudomonas phage PASA16            | n/a                           | no IPS match | no IPS match |
| 61869←62555 | - | hypothetical protein      | 687  | 9.43E-147 | Pseudomonas phage Epa13             | n/a                           | no GO terms  | no GO terms  |
| 62608←62910 | - | hypothetical protein      | 303  | 2.44E-63  | Pseudomonas phage Epa13             | n/a                           | no IPS match | no IPS match |
| 62923←63069 | - | hypothetical protein      | 147  | 5.96E-24  | Pseudomonas phage Epa13             | n/a                           | no GO terms  | no GO terms  |
| 63237←63395 | - | hypothetical protein      | 159  | 3.40E-31  | Pseudomonas phage Epa13             | n/a                           | no IPS match | no IPS match |
| 63566→64948 | + | hypothetical protein      | 1383 | 0         | Pseudomonas phage Epa22             | n/a                           | no GO terms  | no GO terms  |

|             |   |                      |     |          |                          |     |              |              |
|-------------|---|----------------------|-----|----------|--------------------------|-----|--------------|--------------|
| 64985←65368 | - | hypothetical protein | 384 | 1.08E-69 | Pseudomonas phage Epa22  | n/a | no IPS match | no IPS match |
| 65368←65514 | - | hypothetical protein | 147 | 1.13E-26 | Pseudomonas phage PASA16 | n/a | no IPS match | no IPS match |
